# Supplementary material for: Rational Design of Multiclade Coronavirus Spike Immunodominant Domain Nanoparticles to Elicit Broad Antibody Responses
Source: Research Square preprint supplement (doi:10.21203/rs.3.rs-7997313/v1), 2025-12-10
Supplement: Supplementary file 2 [file ded20e263819beb8d81ffa70.pdf]

# **Rational Design of Multiclade Coronavirus Spike Immunodominant Domain Nanoparticles**

## **Elicit Broad Antibody Responses**

Christian K.O. Dzuovor<sup>1</sup>, Sydney Moak<sup>1,2</sup>, Lindsay R. McManus<sup>1</sup>, Abigail Thomas<sup>1,3</sup>, Abigail E. Dzordzorme<sup>1,4,6</sup>, Taewoo Kim<sup>1</sup>, Jeswin Joseph<sup>1</sup>, Valerie Foley<sup>1,3</sup>, Laura Novik<sup>5</sup>, Ingelise J. Gordon<sup>5</sup>, LaSonji A. Holman<sup>5</sup>, Lesia K. Dropulic<sup>5</sup>, Ryan P. McNamara<sup>1</sup>, Kizzmekia S. Corbett-Helaire<sup>1,2,7</sup>

<sup>1</sup>Department of Immunology and Infectious Diseases; Harvard T.H. Chan School of Public Health; Boston, Massachusetts, 02115; United States of America

<sup>2</sup>Howard Hughes Medical Institute; Chevy Chase, Maryland, 20815; United States of America

<sup>3</sup>Northeastern University, Boston, Massachusetts, 02115; United States of America

<sup>4</sup>Harvard-MIT Division of Health Sciences and Technology, Institute for Medical Engineering and Science, Massachusetts Institute of Technology, Cambridge, Massachusetts, 02139; United States of America

<sup>5</sup>Vaccine Research Center; National Institutes of Allergy and Infectious Diseases; National Institutes of Health; Bethesda, Maryland, 20892; United States of America

<sup>6</sup>Current Affiliation: Wyss Institute for Biologically Inspired Engineering, Harvard University, Boston, Massachusetts, 02215; United States of America

<sup>7</sup>Correspondance: [kizzmekia\\_corbett@hsph.harvard.edu](mailto:kizzmekia_corbett@hsph.harvard.edu)

## Extended Data

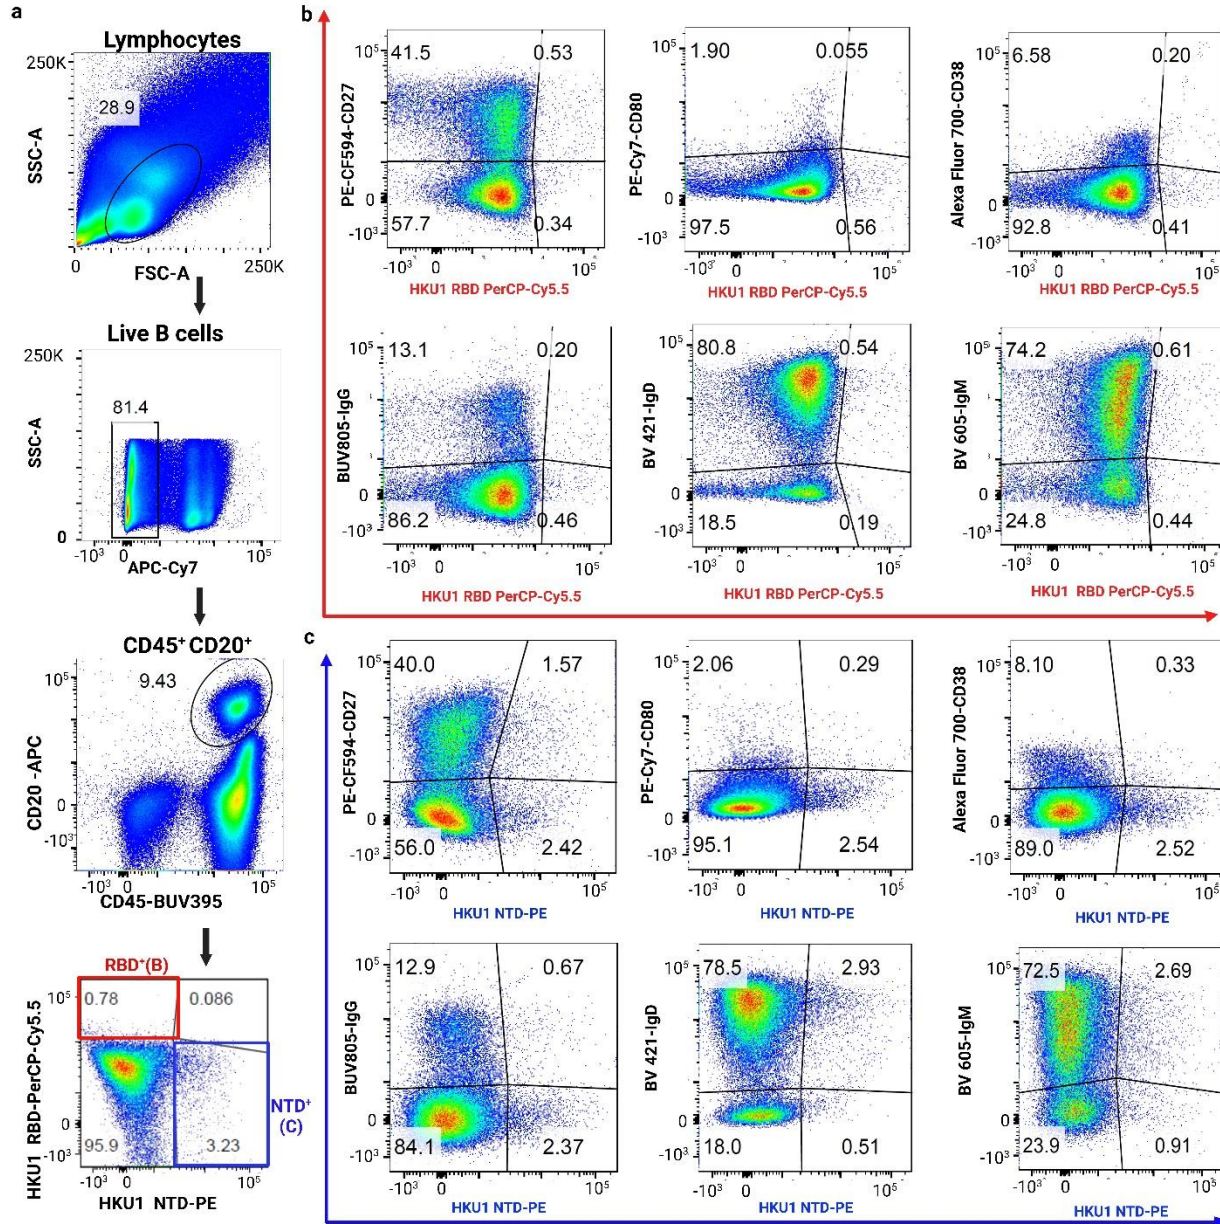

**Extended Data Fig. 1: Representative gating strategy for evaluation of HCoV-HKU1 S1 domain-specific B-cells by flow cytometry, related to Fig. 1f. (a)** FACS analysis for identifying HCoV-HKU1 S RBD and NTD reactive B-cells **(b-c)** Representative flow cytometry plots of CD45 CD20 B-cells binding to fluorescently labelled **(b)** HCoV-HKU1 RBD probe(red) and **(c)** HCoV-HKU1 NTD probe(blue). Identification of B-cell subsets(top) and Ig isotypes (bottom) within B cell population. Numbers in each quadrant indicate percentage of gated cells.

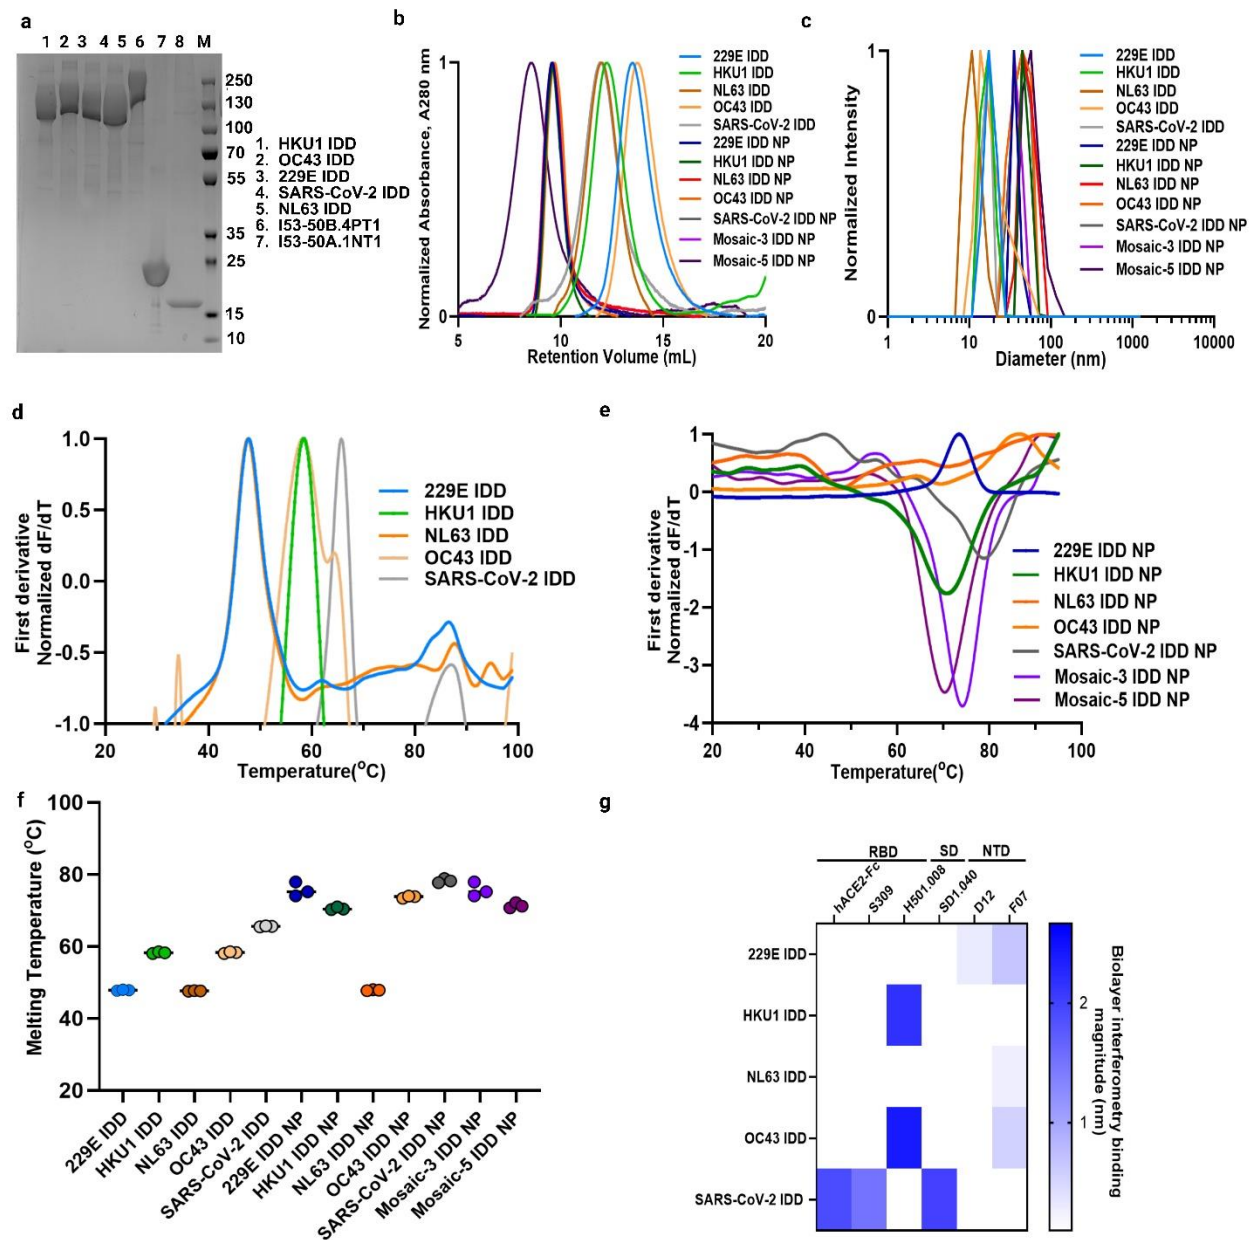

**Extended Data Fig. 2: Design, production and characterization of IDD trimers and IDD NPs, related to Figs. 1h and 2.** (a) SDS-PAGE of affinity-purified chimeric IDD trimers, I53-50A.1NT1, and I53-50B.4PT1 subunits. (b) Size-exclusion chromatograms of unassembled IDD trimers and assembled NPs on a Superose 6 Increase 10/300 GL column. (c) Dynamic light scattering (DLS) of IDD trimers and NPs. The hydrodynamic diameter and polydispersity index (PDI) of each immunogen are shown. (d) Representative thermal melting profiles of IDD trimers measured by conventional differential scanning fluorimetry (DSF). Data represent the average of  $n=3$  technical replicates. (e) Representative thermal melting profiles of NPs measured by nano differential scanning fluorimetry (nanoDSF). Data represent the average of three technical replicates. (f) Thermal melting temperatures of IDD trimers and IDD NPs measured by DSF. Data represent the average of three technical replicates. (g) Antigenic characterization of IDD trimers by bio-layer interferometry. Antigenicity was performed by assessing binding of immunogens to receptor, hACE2-

Fc and S1 domain-specific mAbs. hACE2-Fc and S309 bind to SARS-CoV-2 RBD. H501.008 binds to HCoV-HKU1 and HCoV-OC43 RBD. SD1.040 binds to SARS-CoV-2 Subdomain, SD1. D12 and F07 bind to HCoV-229E and HCoV-NL63 NTD. Blue intensity signifies the magnitude of binding.

| Convalescent<br>Sera<br>Subject ID |   | Coated Immunogens |                   |                      |                    |                    |
|------------------------------------|---|-------------------|-------------------|----------------------|--------------------|--------------------|
|                                    |   | BSA               | SARS-CoV-2<br>IDD | SARS-CoV-2<br>IDD NP | Mosaic-3 IDD<br>NP | Mosaic-5 IDD<br>NP |
| Pre-pandemic<br>Era                | A | 2                 | 2                 | 2                    | 3.6                | 4.6                |
|                                    | B | 2                 | 2                 | 2                    | 3.9                | 4.2                |
|                                    | C | 2                 | 2                 | 2                    | 4.7                | 4.5                |
|                                    | D | 2                 | 2                 | 2                    | 4.5                | 4.8                |
| COVID-19 Era                       | E | 2                 | 2.5               | 3.8                  | 3.5                | 4.2                |

Endpoint Titer  
(Log10)

4 – 5

3 – 4

2.5 – 3

2

**Extended Data Fig. 3: Human convalescent sera reactivity to IDD trimers.** Sera from convalescent donors with pre-existing immunity acquired by infection in pre-pandemic and COVID-19 pandemic era were tested for IgG binding to IDD immunogens. Data are presented as Logarithmic(Log10) mean endpoint titer and indicated with colors. Dark red = 4-5, red = 3-4, yellow = 2.5-3, and uncolored = 2. BSA (negative control), SARS-CoV-2 IDD trimers and IDD NPs were used to coat ELISA plates, followed by incubation with serially diluted sera (starting at 1:100) and detection with type-specific secondary antibodies. Samples were run in triplicate and performed twice.



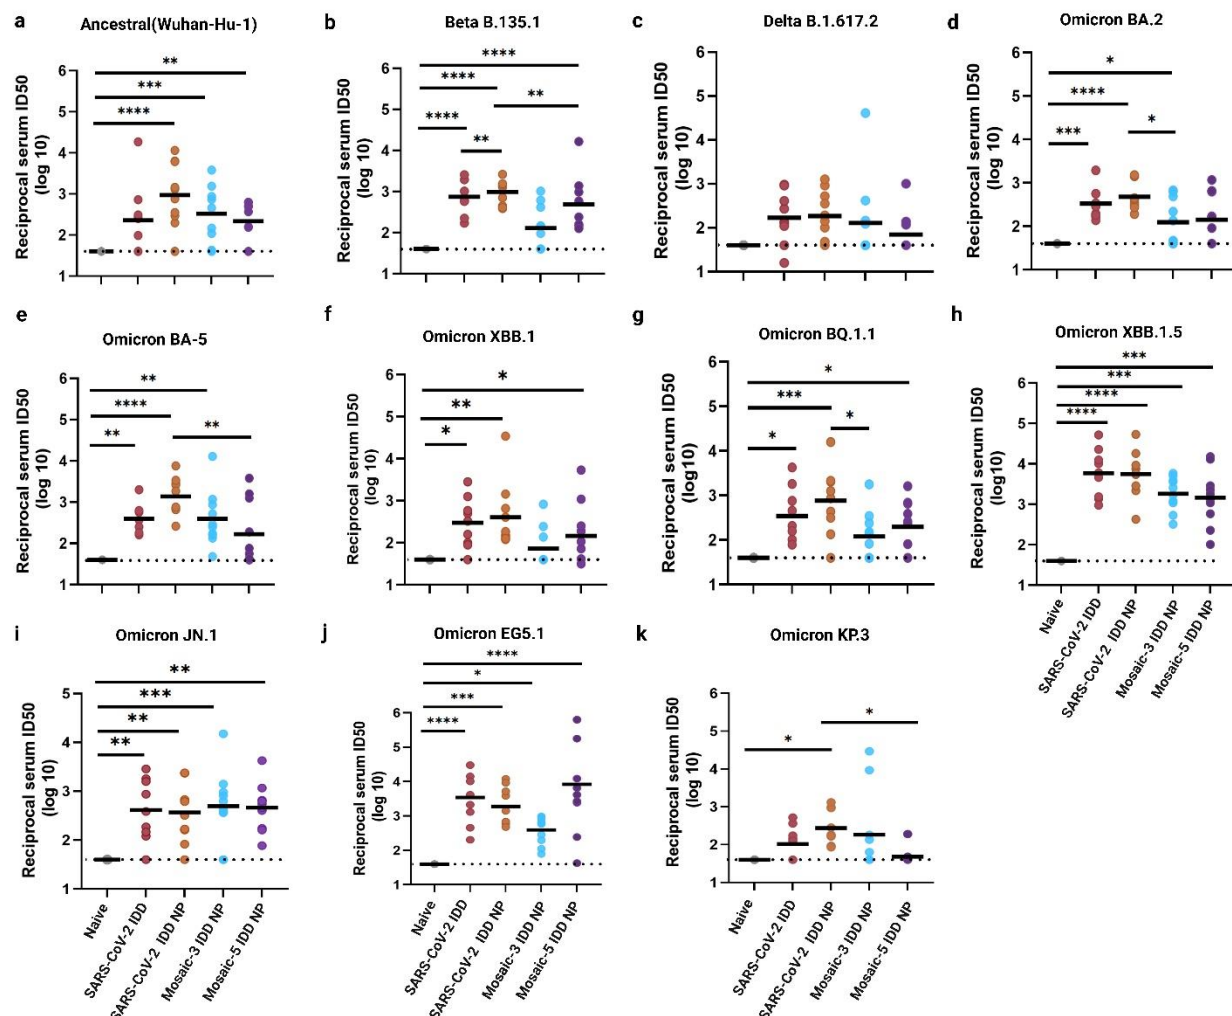

**Extended Data Fig. 4: Neutralizing antibody responses in immunized mice against SARS-CoV-2 pseudotyped viruses related to Fig. 4b, left.** Sera collected 2-weeks post immunization were evaluated for neutralization against the following pseudotyped SARS-CoV-2 strains: ancestral (Wuhan-Hu-1), Beta, Delta, Omicron BA.2, BA.5, XBB.1, BQ1.1, XBB 1.5, JN.1, EG5.1, and KP.3. Horizontal dashed lines represents the assay LOD. Bars indicates geometric mean ID<sub>50</sub> for ten mice per group. Each dot represents an individual mouse. Two-way ANOVA with Tukey's post-hoc test was used to compare geometric mean ID<sub>50</sub> titers. Statistical significance is displayed as follows: \* $p < 0.05$ ; \*\* $p < 0.01$ ; \*\*\* $p < 0.001$ ; \*\*\*\* $p < 0.0001$ .

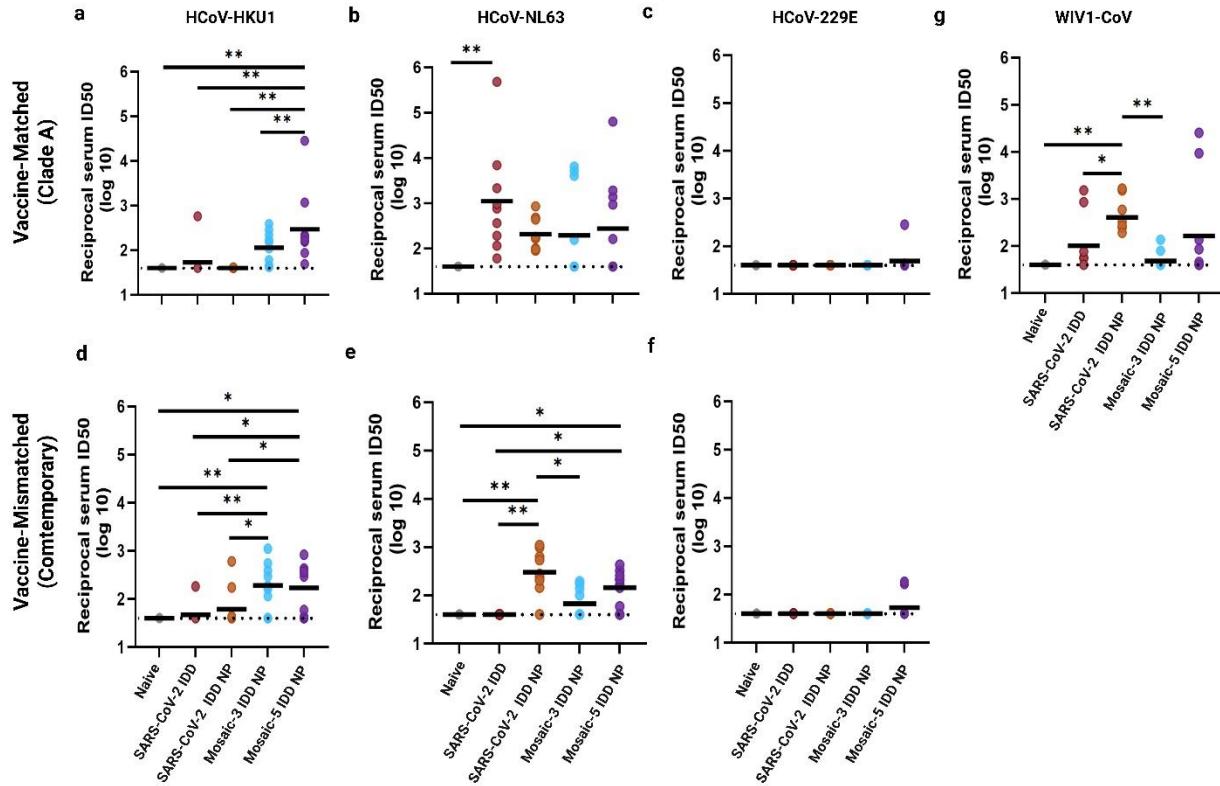

**Extended Data Fig. 5: Comparison of neutralizing antibody response against endemic pseudotyped CoVs and pandemic-threat WIV1-CoV, related to Fig. 4b.** (a-g) Sera collected 2-weeks post-boost immunization were evaluated for neutralization of a panel of pseudotyped viruses displaying vaccine-matched (a-c) and mismatched (d-f): HCoV-HKU1, HCoV-NL63, HCoV-229E spikes and pandemic-threat WIV1-CoV (g). The horizontal dashed line represents the limit of detection (LOD). Bar indicates geometric mean of ID<sub>50</sub> for N=10 mice per group. Each dot represents a mouse in a group. Two-way ANOVA with Tukey's post-hoc test was performed to convert ID<sub>50</sub> values to log<sub>10</sub> scale. The statistical significance is displayed as follows: \*p < 0.05; \*\*p < 0.01; \*\*\*p < 0.001; \*\*\*\*p < 0.0001.

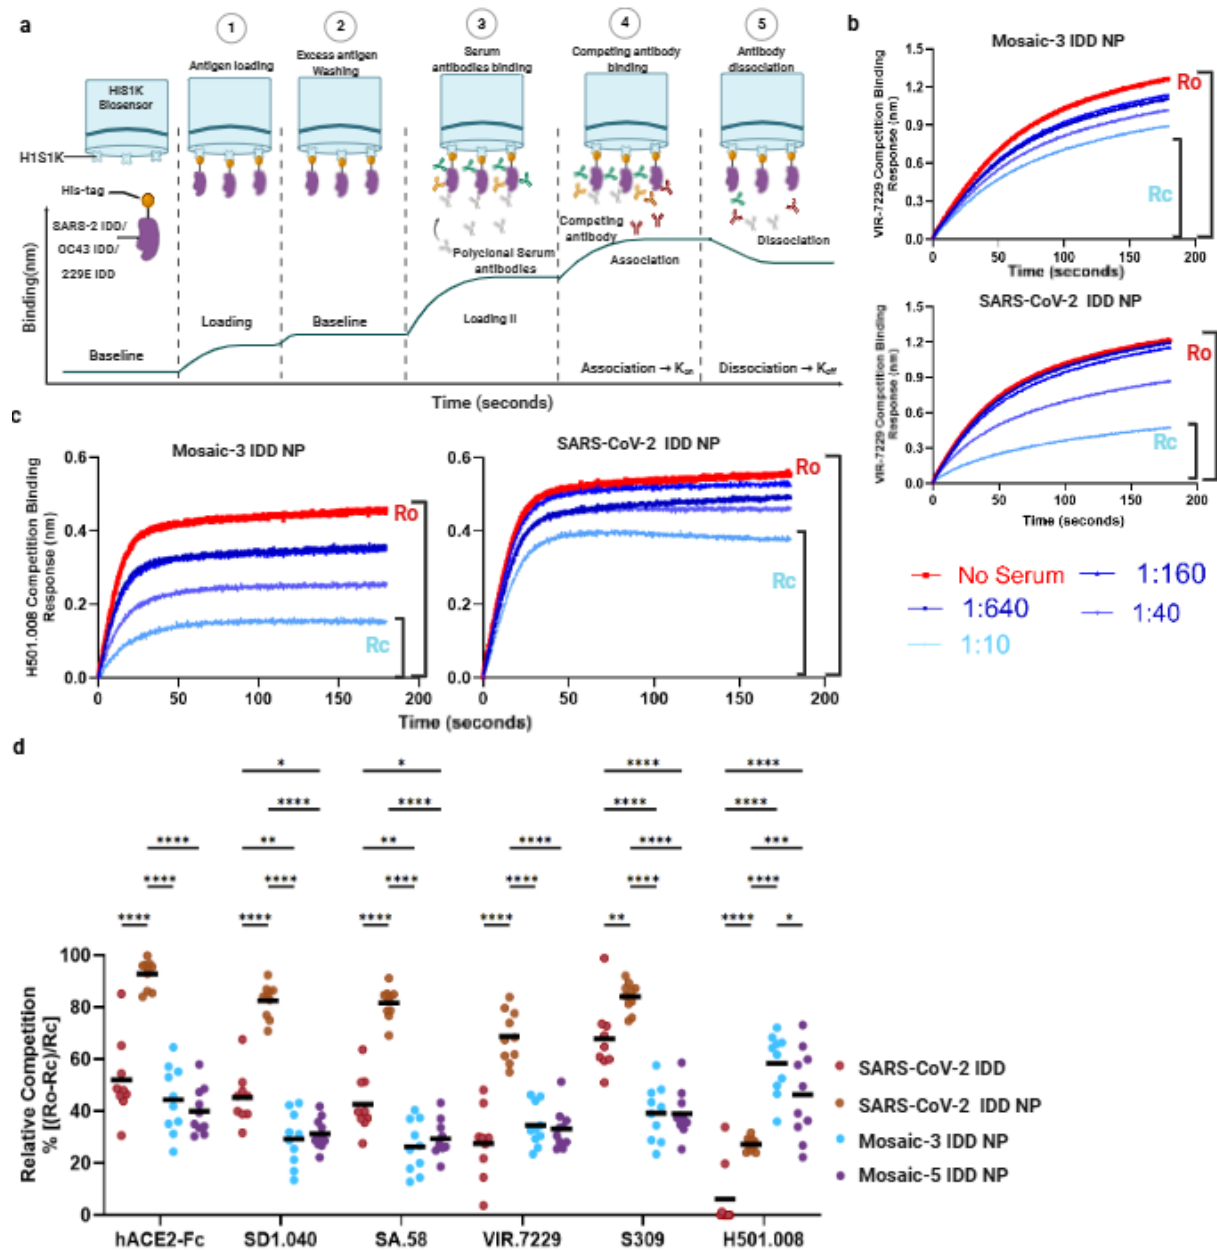

**Extended Data Fig. 6: Detection of antibodies and epitope mapping in immune sera using bio layer interferometry competition binding assay.** (a) Experimental workflow for serum competition assay as measured by BLI. (b, c) Representative binding data curves for mAbs VIR-7229 and H501-008 competing with serially diluted immune sera from mice immunized with Mosaic-3 IDD NP and SARS-CoV-2 IDD NP. Ro represents the highest binding signals of VIR-7229 and H501-008 without serum. Rc represents the highest binding signals of VIR-7229 and H501.008 tested with sera from vaccinated mice. (d) Cross-competition and inhibition of immune sera by indicated mAbs. 1:10 sera dilution is shown. Bar indicates mean percent inhibition for N=10 mice per group. Each dot represents an individual mouse in a group. Two-way ANOVA with Tukey's post-hoc test was performed. The statistical significance is displayed as follows: \*p < 0.05; \*\*p < 0.01; \*\*\*p < 0.001; \*\*\*\*p < 0.0001.



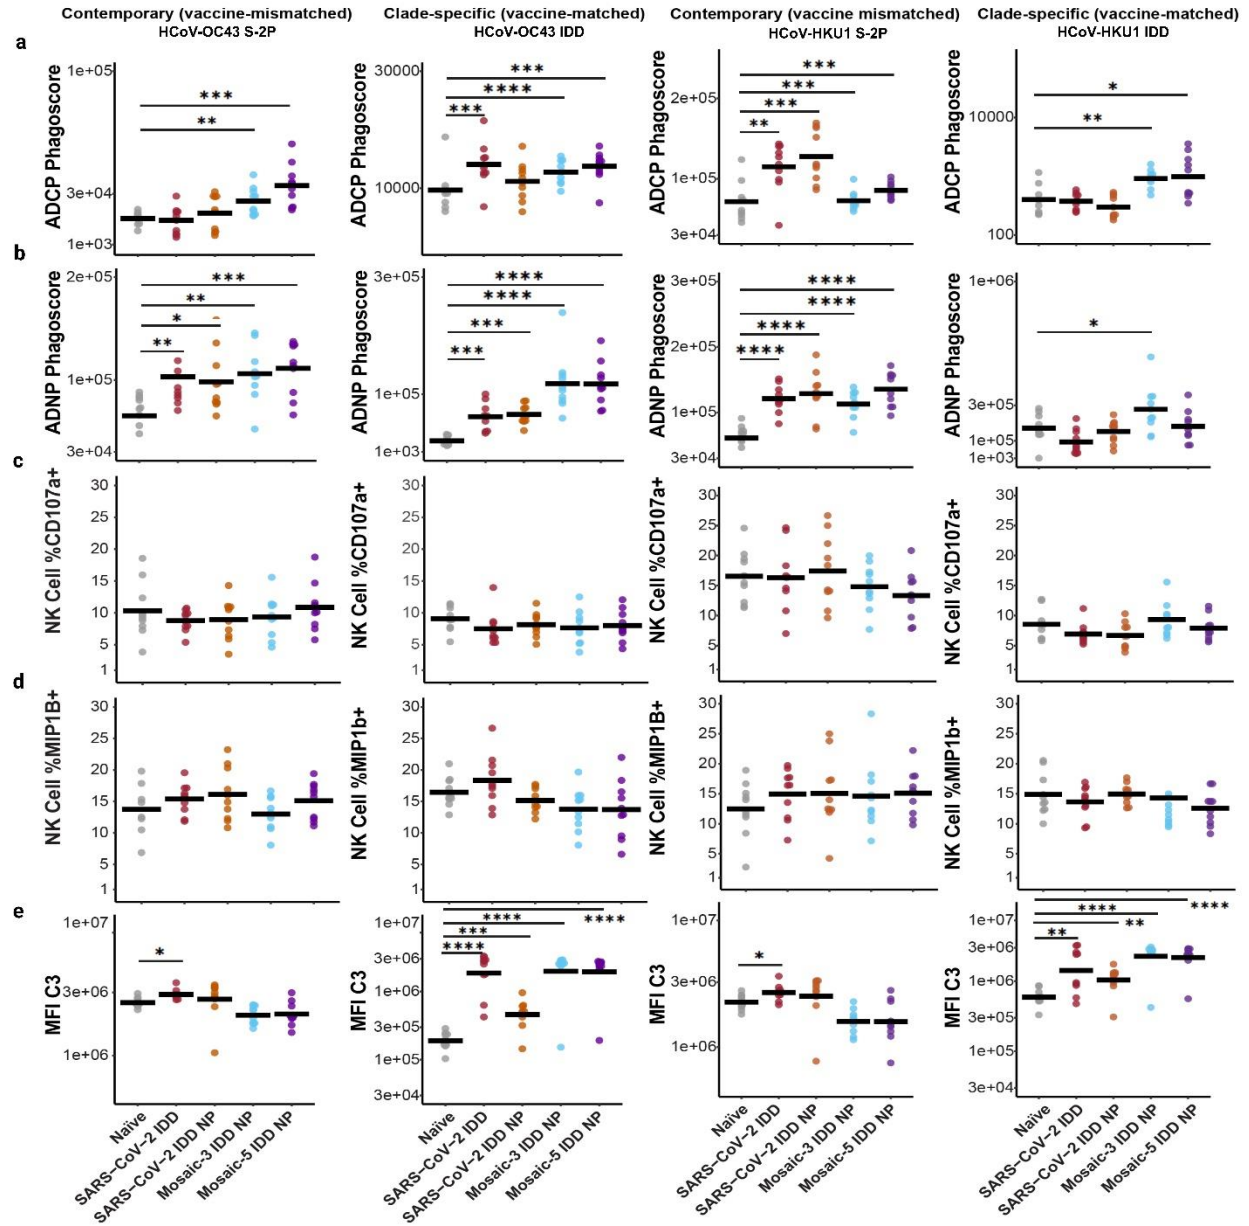

**Extended Data Fig. 7: Fc antibody-dependent functional scores (ADCP, ADNP, ADNKA, ADCD) against endemic HCoV-OC43 and HCoV-HKU1.** (a-e) Fc-mediated effector functions of the naïve and immune sera after vaccination with IDD NPs against contemporary HCoV-OC43 S-2P (left-hand column), clade-specific HCoV-OC43 IDD (left-middle column), contemporary HCoV-HKU1 S-2P (right middle column), and clade-specific HCoV-HKU1 IDD. Antibody-mediated cellular phagocytosis with monocytes (ADCP, **a**) or neutrophils (ADNP, **b**) using IDD-vaccine-induced immune and naïve sera and beads coated with indicated HCoV-HKU1 and HCoV-OC43 proteins. (**c-d**), Antibody-dependent natural killer cell activation (ADNKA) using IDD-vaccine-induced immune and naïve sera and beads coated with indicated HCoV-OC43 and HCoV-HKU1 proteins. **c**, Percentages of NK cells expressing CD107a against the antigens by vaccine group. **d**, Percentages of NK cells expressing MIP-1 $\beta$  against the antigens by vaccine group. The experiment was run with PBMCs from two separate donors. (**e**) Antibody-dependent deposition of complement (ADCD) on beads coated with indicated HCoV-HKU1 and HCoV-OC43 proteins and

incubated with naïve or immune sera. In all figures, the horizontal black bar indicates the group mean value (N=10 mice per group). Each dot represents an individual mouse in a group. Two-way ANOVA with Tukey's post-hoc test was performed. The statistical significance is displayed as follows: \* $p < 0.05$ ; \*\* $p < 0.01$ ; \*\*\* $p < 0.001$ ; \*\*\*\* $p < 0.0001$ . Source data file is provided.
